# Supplementary material for: Cost-Effectiveness of Treatment Decisions for Early Childhood Caries in Infants and Toddlers: A Systematic Review
Source: MDPI journal article supplement (doi:10.3390/medicina59101865), 2023-10-20
Supplement: s1 [file s1]

| ID | Autoren                  | Quelle                                                             | Grund<br>Exclusion |
|----|--------------------------|--------------------------------------------------------------------|--------------------|
| 1  | van Ligten et al.        | Community Dentistry and Oral Epidemiology 2023 [Article in press]  | NR                 |
| 2  | Ono et al.               | Community Dentistry and Oral Epidemiology 2023; 51: 2228-235       | NR                 |
| 3  | Tabatabai &<br>Kjellberg | European Journal of Orthodontics 2023 [Article in press]           | Review             |
| 4  | Egil & Yaylali           | Journal of Public Health Dentistry 2023; 831: 43-50                | NR                 |
| 5  | Lin et al.               | JDR Clinical and Translational Research 2023 [Article in Press]    | NR                 |
| 6  | Ruff et al.              | JAMA Network Open 2023; 62: E2255458                               | NR                 |
| 7  | Surtie et al.            | Cleft Palate-Craniofacial Journal 2023 [Article in Press]          | NR                 |
| 8  | Bhatt et al.             | Dental Research Journal 2023; 20:1 18                              | NR                 |
| 9  | Khairinisa et al.        | BMC Oral Health 2023; 23(1): 172                                   | NR                 |
| 10 | Kateeb et al.            | BMC Oral Health 2023; 23(1): 152                                   | NR                 |
| 11 | Azimi et al.             | International Journal of Paediatric Dentistry 2023; 33(3): 234-245 | NR                 |
| 12 | Chiba et al.             | Caries Research 2023; 57(1): 43-51                                 | NR                 |
| 13 | Ariyavutikul et al.      | International Journal of Paediatric Dentistry 2023; 33(2): 113-123 | NR                 |
| 14 | Wu et al.                | Clinical Oral Investigations 2023; 27(2): 773-785                  | NR                 |
| 15 | Manchanda et al.         | Archives of Oral Biology 2023; 146: 105607                         | NR                 |
| 16 | Oliveira et al.          | Acta Odontologica Scandinavica 2023; 81(3): 216-226                | NR                 |
| 17 | Folayan et al.           | International Journal of Paediatric Dentistry 2023; 33(1): 74-81   | NR                 |
| 18 | Tsai et al.              | International Journal of Paediatric Dentistry 2023; 33(1): 1-11    | NR                 |
| 19 | Gupta et al.             | Community Dentistry and Oral Epidemiology 2022; 50(5): 430-436     | NR                 |
| 20 | Wang et al.              | BMJ Open 2022; 12(9): e061601                                      | NR                 |
| 21 | Zolnikov et al.          | Journal of Public Health Dentistry 2022; 82:4 365-371              | NR                 |
| 22 | Da Silva et al.          | Journal Canadian Dental Association 2022; 88: m9                   | NR                 |
| 23 | Mehta et al.             | Clinical and Experimental Allergy 2022; 52:8 1053                  | NR                 |
| 24 | Yusuf et al.             | Archives of Disease in Childhood 2022; 107 (Supplement 2): A338    | NR                 |
| 25 | Wajahat et al.           | Journal of Taibah University Medical Sciences 2022; 17:3 408-414   | NR                 |

|    |                       |                                                                                        |             |
|----|-----------------------|----------------------------------------------------------------------------------------|-------------|
| 26 | Sanghvi et al.        | Community Dentistry and Oral Epidemiology 2022 [Article in Press]                      | NR          |
| 27 | Lucas-Rincon et al.   | Community Dental Health 2022; 39:2 86-91                                               | NR          |
| 28 | Victory et al.        | Applied Health Economics and Health Policy 2022; 20(3): 431-445                        | NR          |
| 29 | Anopa et al.          | JDR Clinical and Translational Research 2022 [Article in Press]                        | NR          |
| 30 | Herndon et al.        | Journal of Public Health Dentistry 2022; 82:2 176-185                                  | NR          |
| 31 | Okuji et al.          | MedRxiv 2022 [Article in Press]                                                        | NR          |
| 32 | Migas et al.          | International Journal of Environmental Research and Public Health 2022; 19(4): 2183    | NR          |
| 33 | Meyer et al.          | Journal of Prevention 2022; 43:1 111-123                                               | NR          |
| 34 | Karthiga et al.       | Journal of Pharmaceutical Negative Results 2022; 13 1353-1358                          | NR          |
| 35 | Jivraj et al.         | The Journal of Evidence-Based Dental Practice 2022; 22:1 101662                        | Fallbericht |
| 36 | Prabhu et al.         | Journal of the Indian Society of Pedodontics and Preventive Dentistry 2022;            | NR          |
| 37 | Ganesh et al.         | Caries Research 2022; 56(4): 399-406                                                   | NR          |
| 38 | Nizar et al.          | Clinical and Experimental Dental Research 2022; 8(6): 1523-1532                        | NR          |
| 39 | Kimmie-Dhansay et al. | BMC Oral Health 2022; 22(1): 183                                                       | Review      |
| 40 | Kimmie-Dhansay et al. | BMC Oral Health 2022; 22(1): 32                                                        | Review      |
| 41 | Panchanadikar et al.  | Journal of Indian Society of Pedodontics and Preventive Dentistry 2022; 437-444        | NR          |
| 42 | Boustedt et al.       | European Archives of Paediatric Dentistry 2022; 23(5): 829-833                         | NR          |
| 43 | Chai et al.           | Journal of Dentistry 2022; 125: 104250                                                 | NR          |
| 44 | Liao et al.           | International Journal of Paediatric Dentistry 2022; 32(5): 627-638                     | NR          |
| 45 | Tsuchiya et al.       | Community Dentistry and Oral Epidemiology 2022; 50(4): 300-310                         | NR          |
| 46 | Chevuri et al.        | Indian Journal of Dental Research 2022; 33(3): 297-300                                 | NR          |
| 47 | Peedikayil et al.     | Journal of Indian Society of Pedodontics and Preventive Dentistry 2022; 40(3): 317-323 | NR          |
| 48 | Cho et al.            | Caries Research 2022; 56(2): 129-137                                                   | NR          |
| 49 | Vered et al.          | Quintessence International 2022; 53(6): 546-555                                        | NR          |

|    |                         |                                                                                            |           |
|----|-------------------------|--------------------------------------------------------------------------------------------|-----------|
| 50 | Tantikalchan & Mitrakul | European Archives of Paediatric Dentistry 2022; (3): 437-447                               | NR        |
| 51 | Park & Choi             | International Dental Journal 2022; 72(3): 392-398                                          | NR        |
| 52 | Yawary & Hegde          | International Dental Journal 2022; 73(3): 322-330                                          | Protokoll |
| 53 | Graesser et al.         | International Dental Journal 2022; 72(3): 381-391                                          | NR        |
| 54 | Lara et al.             | International Journal of Paediatric Dentistry 2022; 32(3): 334-343                         | NR        |
| 55 | Tsai & Lawrence         | International Journal of Paediatric Dentistry 2022; 32(3): 352-366                         | NR        |
| 56 | Zulekha et al.          | Journal of Indian Society of Pedodontics and Preventive Dentistry 2022; 40(2): 159-164     | NR        |
| 57 | Panchanadikar et al.    | The Journal of Clinical Pediatric Dentistry 2022; 46(2): 75-85                             | NR        |
| 58 | Agarwal et al.          | The Journal of Clinical Pediatric Dentistry 2022; 46(2): 125-131                           | NR        |
| 59 | Pereira et al.          | Clinical Oral Investigations 2022; 26(2): 1605-1612                                        | NR        |
| 60 | Nogueira et al.         | Journal of Dentistry for Children 2022; 89(1): 11-17                                       | NR        |
| 61 | Gudipaneni et al.       | The Journal of Clinical Pediatric Dentistry 2022; 46(1): 35-43                             | NR        |
| 62 | Aguirre et al.          | European Journal of Paediatric Dentistry 2022; 23(1): 15-20                                | NR        |
| 63 | Agouropoulos et al.     | International Journal of Paediatric Dentistry 2022; 32(1): 82-898                          | NR        |
| 64 | Guclu et al.            | International Journal of Clinical Practice 2021; 75(12): e14888                            | NR        |
| 65 | Liu et al.              | Journal of stomatology 2021; 39:6 703-708                                                  | NR        |
| 66 | Avenetti et al.         | Journal of Dentistry for Children Chicago, Ill 2021; 88(3): 187-195                        | NR        |
| 67 | Schwendicke et al.      | Journal of Dentistry; 2021: 103751                                                         | NR        |
| 68 | Haq et al.              | Fluoride 2021; 54(3): 210-218                                                              | NR        |
| 69 | Aripirala et al.        | Journal of the Indian Society of Pedodontics and Preventive Dentistry 2021; 39(3): 303-309 | NR        |
| 70 | Taylor et al.           | BMC Oral Health 2021; 21:1 318                                                             | Review    |
| 71 | Alshehri et al.         | Australian Health Review; 2021                                                             | NR        |
| 72 | Da Silva et al.         | BMC Oral Health 2021; 21(1): 256                                                           | Protokoll |
| 73 | Rajput et al.           | Special Care in Dentistry 2021; 41:3 358-366                                               | NR        |
| 74 | Alhareky                | Saudi Journal of Medicine and Medical Sciences 2021; 9(2): 113-117                         | Review    |
| 75 | Bianchi et al.          | BMC Oral Health 2021; 21(1): 167                                                           | Protokoll |

|     |                        |                                                                                        |           |
|-----|------------------------|----------------------------------------------------------------------------------------|-----------|
| 76  | Cronin et al.          | BMC Oral Health 2021; 21(1): 158                                                       | NR        |
| 77  | Folayan et al.         | BMC Oral Health 2021; 21(1): 126                                                       | NR        |
| 78  | Tonmukayakul et al.    | Australian Dental Journal 2021; 66(Supplement 1): S63-S70                              | NR        |
| 79  | Abduazimova et al.     | International Journal of Pharmaceutical Research 2021; 13(1): 3752-3757                | NR        |
| 80  | Laloo et al.           | PLoS ONE 2021; 16(1): e0244927                                                         | NR        |
| 81  | Mendes et al.          | F1000 Research 2021; 9: 650                                                            | Protokoll |
| 82  | Sitthisettapong et al. | Frontiers in Public Health 2021; 9 664541                                              | NR        |
| 83  | Oliviera et al.        | Brazilian Oral Research 2021; 35: e126                                                 | NR        |
| 84  | Vaghela et al.         | Journal of Contemporary Dental Practice 2021; 22(12): 1462-1470                        | NR        |
| 85  | Gou et al.             | BMC Oral Health 2021; 21(1): 664                                                       | NR        |
| 86  | Deghatipour et al.     | BMC Oral Health 2021; 21(1): 637                                                       | NR        |
| 87  | Zhou et al.            | BMC Oral Health 2021; 21(1): 572                                                       | NR        |
| 88  | Andrew et al.          | BMC Oral Health 2021; 21(1): 521                                                       | Review    |
| 89  | Faheem et al.          | BMC Oral Health 2021; 21(1): 445                                                       | NR        |
| 90  | Folayan et al.         | BMC Oral Health 2021; 21(1): 415                                                       | NR        |
| 91  | Alade et al.           | BMC Oral Health 2021; 21(1): 73                                                        | NR        |
| 92  | Ladeira et al.         | Community Dentistry and Oral Epidemiology 2021; 49(6) 602-608                          | NR        |
| 93  | Zheng et al.           | BMC Oral Health 2021; 21(1): 181                                                       | NR        |
| 94  | Leelataweewud et al.   | BMC Oral Health 2021; 21(1): 64                                                        | NR        |
| 95  | Culler et al.          | Journal of Public Health Dentistry 2021; 81(1): 29-41                                  | NR        |
| 96  | Almoudi et al.         | Journal of Clinical Pediatric Dentistry 2021; 45(5): 330-336                           | NR        |
| 97  | McGivern et al.        | Journal of the American Dental Association 2021; 152(11): 936                          | NR        |
| 98  | Ruan et al.            | Archives of Oral Biology 2021; 131: 105220                                             | NR        |
| 99  | Abirami et al.         | Caries Research 2021; 55(5): 554-562                                                   | NR        |
| 100 | Kaur et al.            | Journal of Indian Society of Pedodontics and Preventive Dentistry 2021; 39(4): 403-408 | NR        |

|     |                   |                                                                                        |           |
|-----|-------------------|----------------------------------------------------------------------------------------|-----------|
| 101 | Charak et al.     | Journal of Indian Society of Pedodontics and Preventive Dentistry 2021; 39(4): 379-383 | NR        |
| 102 | Anderson et al.   | European Archives of Paediatric Dentistry 2021; 22(5): 947-957                         | NR        |
| 103 | Hernandez et al.  | European Archives of Paediatric Dentistry 2021; 22(5): 833-842                         | NR        |
| 104 | Jordan et al.     | Journal of Dentistry for Children 2021; 88(3): 156-163                                 | NR        |
| 105 | Thomas et al.     | Journal of Public Health Dentistry 2021; 81(3): 224-231                                | NR        |
| 106 | Chen et al.       | Caries Research 2021; 55(4): 310-321                                                   | NR        |
| 107 | Smith et al.      | Community Dentistry and Oral Epidemiology 2021; 49(3): 284-290                         | NR        |
| 108 | Al-Sane et al.    | European Archives of Paediatric Dentistry 2021; 22(3): 449-458                         | NR        |
| 109 | BaniHani et al.   | European Archives of Paediatric Dentistry 2021; 22(3): 433-439                         | NR        |
| 110 | Pereira et al.    | European Archives of Paediatric Dentistry 2021; 22(3): 399-408                         | NR        |
| 111 | Bayram et al.     | Clinical Oral Investigations 2021; 25(5): 2867-2876                                    | NR        |
| 112 | Wattanarat et al. | Clinical Oral Investigations 2021; 25(5): 2891-2903                                    | NR        |
| 113 | Sowmya et al.     | Indian Journal of Dental Research 2021; 32(2): 147-152                                 | NR        |
| 114 | Abedizadeh et al. | Journal of Indian Society of Pedodontics and Preventive Dentistry 2021; 39(2): 196-201 | NR        |
| 115 | Elelmi et al.     | European Archives of Paediatric Dentistry 2021; 22(2): 235-240                         | NR        |
| 116 | Mohamed et al.    | Australian Dental Journal 2021; 66(S1): S27-S36                                        | NR        |
| 117 | Colvara et al.    | Community Dentistry and Oral Epidemiology 2021; 49(1): 10-16                           | Review    |
| 118 | Severino et al.   | European Journal of Paediatric Dentistry 2021; 22(3): 189-198                          | NR        |
| 119 | Buckeridge et al. | International Journal of Paediatric Dentistry 2021; 31(1): 115-121                     | NR        |
| 120 | Machado et al.    | Trials 2020; 21(1): 874                                                                | Protokoll |
| 121 | Ekstrand et al.   | International Journal of Circumpolar Health 2020; 79(1): 1804260                       | NR        |
| 122 | Simpson et al.    | Evidence-Based Dentistry 2020; 21:4 128-129                                            | NR        |
| 123 | Singh et al.      | BMC Oral Health 2020; 20:1 320                                                         | NR        |
| 124 | Asif & Emg        | International Journal of Research in Pharmaceutical Sciences 2020; 11:4 5956-5959      | NR        |
| 125 | Lakshmanan et al. | Indian Journal of Forensic Medicine and Toxicology 2020; 14:4 5864-5870                | NR        |
| 126 | Sankar et al.     | Indian Journal of Forensic Medicine and Toxicology 2020; 14:4 5964-5972                | NR        |
| 127 | Roth el al.       | Journal of Graduate Medical Education 2020; 12:5 571-577                               | NR        |
| 128 | Aarthi et al.     | European Journal of Molecular and Clinical Medicine 2020; 7(2): 6468-6473              | NR        |

|     |                               |                                                                                     |    |
|-----|-------------------------------|-------------------------------------------------------------------------------------|----|
| 129 | Warren et al.                 | Journal of Public Health Dentistry 2020; 80(3): 254-256                             | NR |
| 130 | Richards                      | Evidence-Based Dentistry 2020; 21(3): 100-101                                       | NR |
| 131 | Ludwig et al.                 | Journal of Public Health Dentistry 2020; 80(Supplement 2): S122-S125                | NR |
| 132 | Freeman et al.                | Community Dentistry and Oral Epidemiology 2020; 48:4 328-337                        | NR |
| 133 | Vu et al.                     | Pharmaceutics 2020; 12(7): 1-16                                                     | NR |
| 134 | Freiberg et al.               | International Journal of Environmental Research and Public Health 2020; 17(8): 2672 | NR |
| 135 | Meyer et al.                  | JDR Clinical and Translational Research 2020; 5(2): 146-155                         | NR |
| 136 | El-Yousfi et al.              | BMC Oral Health 2020; 20(1): 69                                                     | NR |
| 137 | Anopaet al.                   | Evidence-Based Dentistry 2020; 21(1): 5-7                                           | NR |
| 138 | Kularatna et al.              | Health and Quality of Life Outcomes 2020; 18(1): 43                                 | NR |
| 139 | Cavalcante et al.             | International Journal of Environmental Research and Public Health 2020; 17(3): 1076 | NR |
| 140 | Pine et al.                   | Journal of Dental Research 2020; 99(2): 168-174                                     | NR |
| 141 | Priyadarshini &<br>Gurunathan | International Journal of Research in Pharmaceutical Sciences 2020; 11(4): 2201-2213 | NR |
| 142 | Medina-Solis et al.           | Medicine United States 2020; 99(7): e19092                                          | NR |
| 143 | Umeda et al.                  | Brazilian Oral Research 2020; 34: e017                                              | NR |
| 144 | Nagarajappa et al.            | Roczniki Panstwowego Zakladu Higieny 2020; 71(1): 113-122                           | NR |
| 145 | Folayan et al.                | BMC Oral Health 2020; 20(1): 336                                                    | NR |
| 146 | Gao et al.                    | Journal of Dentistry 2020; 103: 103522                                              | NR |
| 147 | Lee et al.                    | BMC Oral Health 2020; 20(1): 285                                                    | NR |
| 148 | Piwat et al.                  | Caries Research 2020; 54(45082): 491-501                                            | NR |
| 149 | Hariyani et al.               | Community Dentistry and Oral Epidemiology 2020; 48(6): 561-569                      | NR |
| 150 | Muthu et al.                  | Community Dentistry and Oral Epidemiology 2020; 48(6): 471-479                      | NR |
| 151 | Wagner et al.                 | Clinical Oral Investigations 2020; 24(12): 4313-4324                                | NR |
| 152 | Mei et al.                    | Journal of Dentistry 2020; 102: 103479                                              | NR |
| 153 | Zhu et al.                    | International Journal of Dental Hygiene 2020; 18(4): 352-361                        | NR |
| 154 | Folayan et al.                | International Journal of Paediatric Dentistry 2020; 30(6): 798-804                  | NR |
| 155 | Kubota et al.                 | Oral Health & Preventive Dentistry 2020; 18(1): 973-980                             | NR |

|     |                     |                                                                                        |    |
|-----|---------------------|----------------------------------------------------------------------------------------|----|
| 156 | Lotto et al.        | Journal of Dentistry 2020; 101:103456                                                  | NR |
| 157 | Ibrahim & Nourallah | Clinical and Experimental Dental Research 2020; 6(5): 537-543                          | NR |
| 158 | Muraleedhar et al.  | Community Dentistry and Oral Epidemiology 2020; 48(5): 379-386                         | NR |
| 159 | Lamba et al.        | Clinical Oral Investigations 2020; 24(10): 3467-3475                                   | NR |
| 160 | Jordan et al.       | Journal of Public Health Dentistry 2020; 80(4): 271-277                                | NR |
| 161 | Kyoon-Achan et al.  | Journal of Public Health Dentistry 2020; 80(3): 208-216                                | NR |
| 162 | Nembhwani & Winnier | International Journal of Paediatric Dentistry 2020; 30(5): 619-625                     | NR |
| 163 | Azadani et al.      | Journal of the American Dental Association 2020; 151(8): 568-575                       | NR |
| 164 | Mabangkhru et al.   | Journal of Dentistry 2020; 99: 103375                                                  | NR |
| 165 | Arrow & Forrest     | Community Dentistry and Oral Epidemiology 2020; 48(4): 349-356                         | NR |
| 166 | Sun                 | Acta Odontologica Scandinavica 2020; 78(5): 352-257                                    | NR |
| 167 | Rajab & Abdullah    | Oral Health and Preventive Dentistry 2020; 18(3): 571-582                              | NR |
| 168 | Jiang et al.        | Journal of Dentistry 2020; 87:103349                                                   | NR |
| 169 | Arrow & Forrest     | Australian Dental Journal 2020; 65(2): 158-167                                         | NR |
| 170 | Kim & Koo           | Journal of Dental Research 2020; 99(6): 597-603                                        | NR |
| 171 | Chandhru et al.     | Journal of Indian Society of Pedodontics and Preventive Dentistry 2020; 38(2): 152-157 | NR |
| 172 | Barjatya et al.     | Journal of Indian Society of Pedodontics and Preventive Dentistry 2020; 38(2): 98-103  | NR |
| 173 | Naidu & Nunn        | Oral Health and Preventive Dentistry 2020; 18(2): 245-252                              | NR |
| 174 | Duangthip et al.    | International Dental Journal 2020; 70(2): 100-107                                      | NR |
| 175 | Blue et al.         | BMC Oral Health 2020; 20(1): 90                                                        | NR |
| 176 | Folayan et al.      | BMC Oral Health 2020; 20(1): 54                                                        | NR |
| 177 | Nagarajappa et al.  | European Archives of Paediatric Dentistry 2020; 21(1): 67-74                           | NR |
| 178 | Folayan et al.      | BMC Oral Health 2020; 20(1): 8                                                         | NR |
| 179 | Nahas & Sfeir       | Journal of Contemporary Dental Practice 2020; 21(9): 1012-1017                         | NR |
| 180 | Norrie & Pharand    | Canadian Journal of Dental Hygiene 2020; 548(2): 68-74                                 | NR |

|     |                             |                                                                                        |           |
|-----|-----------------------------|----------------------------------------------------------------------------------------|-----------|
| 181 | Olczak-Kowalczyk et al.     | Oral Health and Preventive Dentistry 2020; 18(4): 833-842                              | NR        |
| 182 | Yokoi et al.                | Acta Odontologica Scandinavica 2020; 1-6                                               | NR        |
| 183 | Meriç et al.                | European Journal of Paediatric Dentistry 2020; 21(1): 13-17                            | NR        |
| 184 | Da Silva et al.             | Journal of Dentistry for Children 2020; 87(1): 12-17                                   | NR        |
| 185 | Samuel et al.               | Journal of Public Health Dentistry 2020; 80(1): 51-60                                  | NR        |
| 186 | Weintraub et al.            | Journal of Public Health Dentistry 2019; 79(4): 298-306                                | NR        |
| 187 | Kroon et al.                | Community Dentistry and Oral Epidemiology 2019; 47:6 470-476                           | NR        |
| 188 | Dahlberg et al.             | Journal of pediatric Health Care 2019; 33:6 702-710                                    | NR        |
| 189 | Huang et al.                | JDR Clinical and Translational Research 2019; 4(4): 378-387                            | NR        |
| 190 | Fernando et al.             | JDR Clinical and Translational Research 2019; 4(4): 333-341                            | NR        |
| 191 | Johhnson et al.             | Journal of Public Health Dentistry 2019; 79(3): 215-221                                | NR        |
| 192 | Arora et al.                | Cochrane Database of Systematic Reviews 2019; 8: CD012595                              | Review    |
| 193 | Fraihat et al.              | International Journal of Environmental Research and Public Health 2019; 16(15): 2668   | Review    |
| 194 | Al Baghdadi et al.          | Pediatrics 2019; 144:2                                                                 | NR        |
| 195 | Rogers et al.               | BMC Oral Health 2019; 19(1): 132                                                       | Review    |
| 196 | Fernandez-Barrera et al.    | Medicine 2019; 98(30): e16634                                                          | Protokoll |
| 197 | Broden et al.               | Acta Odontologica Scandinavica 2019; 77(4): 275-281                                    | NR        |
| 198 | Park et al.                 | Clinical Oral Investigations 2019; 23(5): 2383-2387                                    | NR        |
| 199 | Chen                        | Hu li za zhi The Journal of Nursing 2019; 66:1 4                                       | NR        |
| 200 | Da Silva et al.             | BMC Oral Health 2019; 19:1 6                                                           | Protokoll |
| 201 | Elzembely et al.            | Pediatric Blood and Cancer 2019; 66(1): e27421                                         | NR        |
| 202 | Harrita et al.              | Drug Invention Today 2019; 11(7): 1564-1567                                            | NR        |
| 203 | Folayan et al.              | BMC Oral Health 2019; 20(1): 1                                                         | NR        |
| 204 | Sharma et al.               | Journal of Indian Society of Pedodontics and Preventive Dentistry 2019; 37(4): 339-344 | NR        |
| 205 | Faustino-Silva & Figueiredo | Clinical Oral Investigations 2019; 23(10): 3721-3729                                   | NR        |



|     |                      |                                                                                       |           |
|-----|----------------------|---------------------------------------------------------------------------------------|-----------|
| 206 | Dharmani et al.      | Indian Journal of Dental Research 2019; 30(5): 742-746                                | NR        |
| 207 | Kelly et al.         | Journal of Public Health Dentistry 2019; 79(3): 264-270                               | NR        |
| 208 | Purnima et al.       | Journal of Indian Society of Pedodontics and Preventive Dentistry 2019; 37(3) 232-236 | NR        |
| 209 | Turton et al.        | BMC Oral Health 2019; 19(1): 107                                                      | NR        |
| 210 | Rubin et al.         | Journal of Public Health Dentistry 2019; 79(2): 116-123                               | NR        |
| 211 | Angelopoulou et al.  | Journal of Public Health Dentistry 2019; 79(2): 102-108                               | NR        |
| 212 | Bartosova et al.     | BMC Oral Health 2019; 19(1): 33                                                       | NR        |
| 213 | Winter et al.        | Clinical Oral Investigations 2019; 23(1): 187-197                                     | NR        |
| 214 | Hurley et al.        | BMC Oral Health 2019; 19(1): 13                                                       | NR        |
| 215 | Colombo et al.       | European Journal of Paediatric Dentistry 2019; 20(4): 267-273                         | NR        |
| 216 | Ferrazzano et al.    | European Journal of Paediatric Dentistry 2019; 20(3): 214-218                         | NR        |
| 217 | Muthu et al.         | Oral Health and Preventive Dentistry 2019; 17(3): 277-282                             | NR        |
| 218 | Meyer et al.         | BMC Oral Health 2018; 18(1): 215                                                      | NR        |
| 219 | Schwendicke et al.   | [In Process] BMJ Open 2018; 8(12): e022952                                            | Protokoll |
| 220 | Sibley               | Journal of Pediatric Health Care 2018; 32:6 620-626                                   | NR        |
| 221 | Lee et al.           | Health Services Research 2018; 53(5): 3592-3616                                       | NR        |
| 222 | Burgette<br>Quinonez | & JDR Clinical and Translational Research 2018; 3(4): 336-345                         | NR        |
| 223 | Wang & Chen          | Value in Health 2018; 21(Supplement 2): S58                                           | NR        |
| 224 | Hastie et al.        | American Journal of Hematology 2018; 93(9): E24-E25                                   | NR        |
| 225 | Estai et al.         | Australian Health Review 2018; 42(5): 482-490                                         | Review    |
| 226 | Persaud et al.       | BMJ Open 2018; 8(8): e020941                                                          | Protokoll |
| 227 | Hu et al.            | European Academy of Paediatric Dentistry 2018; 19(4): 221-227                         | NR        |
| 228 | Chen et al.          | Trials 2018; 19(1): 352                                                               | Protokoll |
| 229 | Folayan et al.       | The New Bioethics 2018; 24(2): 135-149                                                | NR        |
| 230 | Trudnak et al.       | Maternal and Child Health Journal 2018; 22(7): 998-1007                               | NR        |
| 231 | Phantumvanit et al.  | Community Dentistry and Oral Epidemiology 2018; 46(3): 280-287                        | NR        |
| 232 | Friedman et al.      | Journal Canadian Dental Association 2018; 84: i5                                      | NR        |

|     |                     |                                                                                        |           |
|-----|---------------------|----------------------------------------------------------------------------------------|-----------|
| 233 | Ruff & Niederman    | BMJ Open 2018; 8(4): e022646                                                           | Protokoll |
| 234 | Ladewig et al.      | Expert Review of Pharmacoeconomics and Outcomes Research 2018; 18(2): 127-134          | Review    |
| 235 | Goldman et al.      | Journal of Dentistry 2018; 70: 80-86                                                   | NR        |
| 236 | Khouja & Smith      | Journal of Public Health Dentistry 2018; 78(2): 118-126                                | NR        |
| 237 | Marino et al.       | BMC Oral Health 2018; 18(1): 24                                                        | NR        |
| 238 | Lakshmi et al.      | Journal of Clinical and Diagnostic Research 2018; 12(2): ZC09-ZC13                     | NR        |
| 239 | Schwendicke et al.  | Community Dentistry and Oral Epidemiology 2018; 46(1): 8-16                            | NR        |
| 240 | Zhang et al.        | BMC Oral Health 2018; 18(1): 203                                                       | NR        |
| 241 | Neves et al.        | Archives of Oral Biology 2018; 96: 155-161                                             | NR        |
| 242 | Xiao et al.         | Journal of Dental Research 2018; 97(13): 1468-1476                                     | NR        |
| 243 | Canares et al.      | General Dentistry 2018; 66(6): 24-28                                                   | NR        |
| 244 | Gavic et al.        | International Journal of Paediatric Dentistry 2018; 28(6): 616-623                     | NR        |
| 245 | Evans et al.        | Community Dentistry and Oral Epidemiology 2018; 46(5): 518-525                         | Protokoll |
| 246 | Seminario et al.    | Journal of Dentistry for Children 2018; 85: 93-101                                     | NR        |
| 247 | Jain et al.         | Indian Journal of Dental Research 141; 29(5): 568-574                                  | NR        |
| 248 | Ismail et al.       | BMC Oral Health 2018; 18(1):126                                                        | NR        |
| 249 | Chandna et al.      | Journal of Indian Society of Pedodontics and Preventive Dentistry 2018; 36(3): 290-295 | NR        |
| 250 | Shackleton et al.   | Community Dentistry and Oral Epidemiology 2018; 46(3): 288-296                         | NR        |
| 251 | Govindaraju et al.  | Indian Journal of Dental Research 2018; 29(3): 313-316                                 | NR        |
| 252 | Campagna et al.     | Pediatric Dentistry 2018; 40(3): 210-214                                               | NR        |
| 253 | George et al.       | Journal of Indian Society of Pedodontics and Preventive Dentistry 2018; 36(2): 130-134 | NR        |
| 254 | Owen et al.         | Australian Dental Journal 2018; 63(1): 72-80                                           | NR        |
| 255 | Muñoz-Millán et al. | Community Dentistry and Oral Epidemiology 2018; 46(1): 63-69                           | NR        |
| 256 | Ozler et al.        | Oral Health and Preventive Dentistry 2018; 16(5): 467-472                              | NR        |
| 257 | Gürlek et al.       | Oral Health and Preventive Dentistry 2018; 16(5): 457-465                              | NR        |
| 258 | Gao et al.          | Journal of Clinical Pediatric Dentistry 2018; 42(5): 367-372                           | NR        |

|     |                      |                                                                                       |             |
|-----|----------------------|---------------------------------------------------------------------------------------|-------------|
| 259 | Rataj-Kulmacz et al. | Oral Health and Preventive Dentistry 2018; 16(4): 363-368                             | NR          |
| 260 | Villavicencio et al. | Journal of Applied Oral Science 2018; 26: e20170318                                   | NR          |
| 261 | Igic et al.          | European Journal of Paediatric Dentistry 2018; 19(2): 161-164                         | NR          |
| 262 | Nguyen et al.        | Journal of Clinical Pediatric Dentistry 2018; 42(3): 173-181                          | NR          |
| 263 | Ugolini et al.       | Oral Health and Preventive Dentistry 2018; 16(1): 87-92                               | NR          |
| 264 | Costa et al.         | Caries Research 2018; 51(6): 582-589                                                  | NR          |
| 265 | Edelstein            | Dent Clin North Am 2017; 613: 589-606                                                 | NR          |
| 266 | Johnson et al.       | Community Dentistry and Oral Epidemiology 2017; 45:6 522-528                          | NR          |
| 267 | Levey et al.         | Trials 2017; 18(1): 515                                                               | Review      |
| 268 | Crystal et al.       | Pediatric Dentistry 2017; 39(5): 135-145                                              | NR          |
| 269 | Dhar et al.          | Pediatric Dentistry 2017; 39(5): 146-159                                              | NR          |
| 270 | Gupta et al.         | Community Dental Health 2017; 34(3): 131-136                                          | Review      |
| 271 | Hansen et al.        | Pediatric Dentistry 2017; 39(4): 304-307                                              | NR          |
| 272 | Jabeen & Umbreen     | Journal of the Liaquat University of Medical and Health Sciences 2017; 16(3): 170-174 | NR          |
| 273 | Foster et al.        | JDR Clinical and Translational Research 2017; 2(3): 287-294                           | NR          |
| 274 | Bindi et al.         | British Dental Journal 2017; 222(10): 809-817                                         | NR          |
| 275 | Flood et al.         | Academic Pediatrics 2017; 17(3): 316-322                                              | NR          |
| 276 | Ganapule et al.      | Blood Coagulation and Fibrinolysis 2017; 28(2): 171-175                               | Review      |
| 277 | Baric & Gabric       | Acta Stomatologica Croatica 2017; 51(1): 86                                           | Fallbericht |
| 278 | Chao et al.          | Paediatric Anaesthesia 2017; 27(1): 98-105                                            | NR          |
| 279 | Chestnutt et al.     | Health Technology Assessment 2017; 21: 21                                             | NR          |
| 280 | Goldman et al.       | Caries Research 2017; 51(5): 489-499                                                  | NR          |
| 281 | Tsai et al.          | Journal of the Chinese Medical Association 2016; 79(8): 456-463                       | NR          |
| 282 | Li et al.            | BMC Oral Health 2017; 17(1): 144                                                      | NR          |
| 283 | Javed et al.         | Journal of Investigative and Clinical Dentistry 2017; 8(4)                            | Review      |
| 284 | Colombo et al.       | Archives of Oral Biology 2017; 83: 282-288                                            | NR          |
| 285 | Chen et al.          | Archives of Oral Biology 2017; 83: 174-180                                            | NR          |

|     |                               |                                                                                          |        |
|-----|-------------------------------|------------------------------------------------------------------------------------------|--------|
| 286 | Beena et al.                  | Journal of Indian Society of Pedodontics and Preventive Dentistry 2017; 35(4): 296-300   | NR     |
| 287 | Faizunisa et al.              | Journal of Indian Society of Pedodontics and Preventive Dentistry 2017; 35(4): 291-295   | NR     |
| 288 | Anderson et al.               | Journal of Dentistry 2017; 65: 83-88                                                     | NR     |
| 289 | Meyer et al.                  | Community Dentistry and Oral Epidemiology 2017; 45(5): 442-448                           | NR     |
| 290 | Heaton et al.                 | Journal of Public Health Dentistry 2017; 77(4): 350-359                                  | NR     |
| 291 | Mitrakul et al.               | European Archives of Paediatric Dentistry 2017; 18(4): 251-261                           | NR     |
| 292 | Wigen et al.                  | International Journal of Dental Hygiene 2017; 15(3): 249-255                             | NR     |
| 293 | Valdez et al.                 | BMC Oral Health 2017; 17(1): 115                                                         | NR     |
| 294 | Bhat et al.                   | Journal of Indian Society of Pedodontics and Preventive Dentistry 2017; 35(3): 193-197   | NR     |
| 295 | Neves et al.                  | Clinical Oral Investigations 2017; 21(6): 2053-2061                                      | NR     |
| 296 | Hernandez et al.              | Journal of the American Dental Association 2017; 148(6): 392-398                         | NR     |
| 297 | Arrow& Klobas                 | Australian Dental Journal 2017; 62(2): 200-207                                           | NR     |
| 298 | Chaffee et al.                | Community Dentistry and Oral Epidemiology 2017; 45(3): 216-224                           | NR     |
| 299 | Collado et al.                | Medicina Oral, Patologia Oral y Cirugia Bucal 2017; 22(3): e333-e341                     | NR     |
| 300 | Priyadarshini et al.          | Journal of Indian Society of Pedodontics and Preventive Dentistry 2017; 35(2): 110-114   | NR     |
| 301 | Kowash et al.                 | European Archives of Paediatric Dentistry 2017; 18(2): 97-103                            | NR     |
| 302 | Thompson et al.               | Pediatric Dentistry 2017; 39(2): 124-129                                                 | NR     |
| 303 | Piva et al.                   | Brazilian Dental Journal 2017; 28(2): 241-248                                            | NR     |
| 304 | Kakanur et al.                | Indian Journal of Dental Research 2017; 28(1): 27-32                                     | NR     |
| 305 | Jiang                         | Oral Health and Preventive Dentistry 2017; 15(1): 89-97                                  | NR     |
| 306 | Wagner &<br>Heinrich-Weltzien | Clinical Oral Investigations 2017; 21(1): 225-235                                        | NR     |
| 307 | Griffin & Griffin             | Journal of Evidence Based Dental Practice 2016; 162: 133-5                               | NR     |
| 308 | O'Keefe et al.                | Community Dentistry and Oral Epidemiology 2016; 44:6 515-522                             | NR     |
| 309 | Mathu-Muju &<br>Kennedy       | Pediatric Dentistry 2016; 38(5): 46-53                                                   | NR     |
| 310 | De Silva et al.               | Cochrane Database of Systematic Reviews 2016; 9: CD009837                                | Review |
| 311 | Ramanath et al.               | Research Journal of Pharmaceutical, Biological and Chemical Sciences 2016; 7(5): 319-327 | NR     |

|     |                       |                                                                  |           |
|-----|-----------------------|------------------------------------------------------------------|-----------|
| 312 | Bruen et al.          | Journal of the American Dental Association 2016; 147(9): 702-708 | NR        |
| 313 | Olegario et al.       | BMC Oral Health 2016; 17(1): 34                                  | NR        |
| 314 | Bergstrom et al.      | Community Dental Health 2016; 33(2): 138-144                     | NR        |
| 315 | Richard               | Evidence-Based Dentistry 2016; 17(2): 35-37                      | NR        |
| 316 | Baek et al.           | International Dental Journal 2016; 66(3): 136-143                | NR        |
| 317 | Lawrence et al.       | British Dental Journal 2016; 220(10): 545-547                    | NR        |
| 318 | Gray-Burrows et al.   | Implementation Science 2016; 11: 61                              | NR        |
| 319 | Wilberg et al.        | Supportive Care in Cancer 2016; 24(4): 1497-1506                 | NR        |
| 320 | Ribeiro et al.        | Ciencia & Saude Coletiva 2016; 21(4): 1217-1226                  | NR        |
| 321 | Mendes et al.         | Trials 2016; 17(1): 69                                           | Protokoll |
| 322 | Gao et al.            | BMC Oral Health 2016; 16: 12                                     | Review    |
| 323 | Pretty & Ekstrand     | European Archives of Paediatric Dentistry 2016; 17(1): 13-25     | Review    |
| 324 | Riggs et al.          | BMC Pregnancy and Childbirth 2016; 16(1): 12                     | NR        |
| 325 | Soni et al.           | Pravara Medical Review 2016; 8(1): 27-29                         | Review    |
| 326 | Hesse et al.          | Trials 2016; 17(1): 169                                          | Protokoll |
| 327 | Griffin et al.        | Health Affairs 2016; 35(12): 2233-2240                           | NR        |
| 328 | Bonetti & Clarkson    | Caries Research 2016; 50(Supplement 1): 45-49                    | NR        |
| 329 | Neidell et al.        | Caries Research 2016; 50(Supplement 1): 78-82                    | NR        |
| 330 | Astvaldsdottir et al. | Caries Research 2016; 50(4): 383-393                             | Review    |
| 331 | Naidu et al.          | BMC Oral Health 2016; 16(1): 128                                 | NR        |
| 332 | Fan et al.            | BMC Oral Health 2016; 16(1): 98                                  | NR        |
| 333 | Castro et al.         | Journal of Dentistry for Children 2016; 83(3): 125-131           | NR        |
| 334 | Memarpour et al.      | Caries Research 2016; 55(5): 433-442                             | NR        |
| 335 | Dabiri et al.         | International Dental Journal 2016; 66(4): 221-228                | NR        |
| 336 | Edelstein et al.      | Pediatric Dentistry 2016; 38(4): 325-330                         | NR        |
| 337 | Colombo et al.        | Archives of Oral Biology 2016; 67: 22-27                         | NR        |
| 338 | Ng & Fida             | Journal of Evidence-Based Dental Practice 2016; 16: 20-33        | NR        |
| 339 | Arrow & Klobas        | Australian Dental Journal 2016; 61(2): 227-235                   | NR        |

|     |                         |                                                                    |           |
|-----|-------------------------|--------------------------------------------------------------------|-----------|
| 340 | Bezerra et al.          | Caries Research 2016; 50(3): 279-287                               | NR        |
| 341 | Mothupi et al.          | Journal of Dentistry for Children 2016; 83(2): 83-87               | NR        |
| 342 | Turton et al.           | European Archives of Paediatric Dentistry 2016; 17(2): 97-105      | NR        |
| 343 | Rodríguez et al.        | Journal of Dental Research 2016; 95(4): 402-407                    | NR        |
| 344 | Custodio-Lumsden et al. | Journal of Public Health Dentistry 2016; 76(2): 136-142            | NR        |
| 345 | Arrow                   | Caries Research 2016; 50(1): 1-8                                   | NR        |
| 346 | Arrow                   | Community Dentistry and Oral Epidemiology 2016; 44(1): 1-10        | NR        |
| 347 | Paglia et al.           | European Journal of Paediatric Dentistry 2016; 17(2): 93-99        | NR        |
| 348 | Schroth et al.          | Journal of Public Health Dentistry 2016; 76(3): 206-212            | NR        |
| 349 | Gopal et al.            | Oral Health and Preventive Dentistry 2016; 14(3): 267-273          | NR        |
| 350 | Cunha-Cruz et al.       | Trials 2015; 16: 278                                               | Protokoll |
| 351 | Fyfe et al.             | New Zealand Medical Journal 2015; 128(1427): 38-46                 | NR        |
| 352 | Wright et al.           | BMC Oral Health 2015; 15: 160                                      | NR        |
| 353 | Goyal et al.            | The Journal of Clinical Pediatric Dentistry 2015; 39(2): 109-112   | NR        |
| 354 | Pine et al.             | Trials 2015; 16(1): 505                                            | Protokoll |
| 355 | Jaeger et al.           | Journal of Emergency Medicine 2015; 49(5): 729-739                 | NR        |
| 356 | Jackson                 | Primary Dental Journal 2015; 4(4): 46-51                           | NR        |
| 357 | Stewart et al.          | Primary Dental Journal 2015; 4(4): 67-73                           | NR        |
| 358 | Chu et al.              | Trials 2015; 16(1): 426                                            | Protokoll |
| 359 | Gao et al.              | Trials 2015; 16(1): 416                                            | Protokoll |
| 360 | Tonmukayakul et al.     | Contemporary Clinical Trials 2015; 44: 36-41                       | Protokoll |
| 361 | Lalloo et al.           | BMC Oral Health 2015; 15: 99                                       | NR        |
| 362 | Anopa et al.            | PLoS ONE 2015; 10(8): e0136211                                     | NR        |
| 363 | Ekstrand & Qvist        | International Journal of Paediatric Dentistry 2015; 25(4): 255-266 | NR        |
| 364 | Casamassimo & Seale     | Journal of Dental Education 2015; 79(6): 644-652                   | NR        |

|     |                    |                                                                  |             |
|-----|--------------------|------------------------------------------------------------------|-------------|
| 365 | Alsharif et al.    | Journal of Public Health Dentistry 2015; 75(3): 202-209          | NR          |
| 366 | Schwendicke et al. | Journal of Dentistry 2015; 43(6): 647-655                        | NR          |
| 367 | Tinanoff           | Pediatric Dentistry 2015; 37(3): 198-199                         | NR          |
| 368 | Douglass & Clark   | Pediatric Dentistry 2015; 37(3): 266-274                         | NR          |
| 369 | Compton            | Pediatric Dentistry 2015; 37(3): 288-293                         | NR          |
| 370 | Edelstein et al.   | Journal of the American Dental Association 2015; 146(4): 224-232 | NR          |
| 371 | Mejare et al.      | PLoS ONE 2015; 10(2): e0117537                                   | Review      |
| 372 | Schwendicke        | Journal of Dental Research 2015; 94(2): 272-280                  | NR          |
| 373 | Conquest et al.    | International Dental Journal 2015; 65(1): 32-38                  | NR          |
| 374 | Schwendicke et al. | Trials 2015; 16(1): 11                                           | Protokoll   |
| 375 | Folayan et al.     | BMC Oral Health 2015; 15(1): 72                                  | NR          |
| 376 | Arrow & Klobas     | Community Dentistry and Oral Epidemiology 2015; 43(6): 511-520   | NR          |
| 377 | Koh et al.         | Community Dentistry and Oral Epidemiology 2015; 43(6): 560-568   | NR          |
| 378 | Samnaliev et al.   | Journal of Public Health Dentistry 2015; 75(1): 24-33            | NR          |
| 379 | Ghazal et al.      | Journal of Public Health Dentistry 2015; 75(1): 42-48            | NR          |
| 380 | Qiu et al.         | BMC Oral Health 2015; 15(1): 144                                 | NR          |
| 381 | Saraithong et al.  | Clinical Oral Investigations 2015; 19(8): 1955-1964              | NR          |
| 382 | Arrow & Klobas     | Australian Dental Journal 2015; 60(3): 375-381                   | NR          |
| 383 | Romanos et al.     | Caries Research 2015; 49(4): 425-433                             | NR          |
| 384 | EzEldeen et al.    | European Archives of Paediatric Dentistry 2015; 16(4): 333-340   | NR          |
| 385 | Kneist et al.      | European Archives of Paediatric Dentistry 2015; 16(4): 365-370   | NR          |
| 386 | Ghazal et al.      | Community Dentistry and Oral Epidemiology 2015; 43(4): 366-374   | NR          |
| 387 | Baggio et al.      | BMC Oral Health 2015; 15(1): 82                                  | NR          |
| 388 | Nakayama & Mori    | Journal of Public Health Dentistry 2015; 75(2): 157-162          | NR          |
| 389 | Nicol et al.       | Australian Dental Journal 2015; 60(1): 73-79                     | NR          |
| 390 | Abbasolu et al.    | Caries Research 2015; 49(1): 70-77                               | NR          |
| 391 | Tannure et al.     | Journal of Clinical Pediatric Dentistry 2015; 39(5): 410-414     | Fallbericht |

|     |                        |                                                                                        |           |
|-----|------------------------|----------------------------------------------------------------------------------------|-----------|
| 392 | Mattos-Silveira et al. | Trials 2014; 15: 448                                                                   | Protokoll |
| 393 | Quissell et al.        | Contemp Clin Trials 2014; 372: 242-51                                                  | NR        |
| 394 | Bansal et al.          | Indian Journal of Dental Research 2014; 25(6): 777-782                                 | NR        |
| 395 | Zaliskyy et al.        | Value in Health 2014; 17(7): A613                                                      | NR        |
| 396 | Zhang & Yang           | Value in Health 2014; 17(7): A781-A782                                                 | NR        |
| 397 | Johnson et al.         | Australian Dental Journal 2014; 59(3): 366-371                                         | NR        |
| 398 | Kranz et al.           | Journal of Dental Research 2014; 93(7): 633-638                                        | NR        |
| 399 | Batliner et al.        | Trials 2014; 15(1): 125                                                                | NR        |
| 400 | Larson                 | Northwest Dentistry 2014; 93(2): 35-38                                                 | NR        |
| 401 | Berg                   | Journal of the California Dental Association 2014; 42(7): 442-447                      | NR        |
| 402 | Liu et al.             | BMC Oral Health 2014; 14: 54                                                           | NR        |
| 403 | Fisher-Owens           | Pediatric Dentistry 2014; 36(2): 115-120                                               | NR        |
| 404 | Vermaire et al.        | Caries Research 2014; 48(3): 244-253                                                   | NR        |
| 405 | Kowash                 | Applied Clinical Research, Clinical Trials and Regulatory Affairs 2014; 1:2            | Review    |
| 406 | Tam                    | Journal of Investigative Medicine 2014; 62(1): 247                                     | NR        |
| 407 | Agouropoulos et al.    | Journal of Dentistry 2014; 42(10): 1277-1283                                           | NR        |
| 408 | Anandakrishna et al.   | Indian Journal of Dental Research 2014; 25(5): 602-606                                 | NR        |
| 409 | Mathur et al.          | Indian Journal of Dental Research 2014; 25(5): 559-566                                 | NR        |
| 410 | Batliner et al.        | Journal of Public Health Dentistry 2014; 74(4): 317-325                                | NR        |
| 411 | Chi et al.             | Journal of Public Health Dentistry 2014; 74(4): 261-265                                | NR        |
| 412 | Nicol et al.           | BMC Oral Health 2014; 14(1): 69                                                        | NR        |
| 413 | Quinonez et al.        | BMC Oral Health 2014; 14(1): 33                                                        | NR        |
| 414 | Pesaressi et al.       | BMC Oral Health 2014; 14(1): 17                                                        | NR        |
| 415 | Han et al.             | Community Dentistry and Oral Epidemiology 2014; 42(1): 70-78                           | NR        |
| 416 | Wulaerhan et al.       | BMC Oral Health 2014; 14(1): 136                                                       | NR        |
| 417 | Anitha et al.          | Journal of Indian Society of Pedodontics and Preventive Dentistry 2014; 32(3): 220-224 | NR        |



|     |                          |                                                                                              |             |
|-----|--------------------------|----------------------------------------------------------------------------------------------|-------------|
| 418 | Ramos-Jorge et al.       | Community Dentistry and Oral Epidemiology 2014; 42(4): 311-322                               | NR          |
| 419 | Cuadros Fernández et al. | European Journal of Paediatric Dentistry 2014; 15(1): 229-233                                | Fallbericht |
| 420 | Aljafari et al.          | Community Dental Health 2014; 31(2): 75-79                                                   | NR          |
| 421 | Congiu et al.            | Journal of Public Health Dentistry 2014; 74(2): 147-152                                      | NR          |
| 422 | El Batawi                | European Archives of Paediatric Dentistry 2014; 15(3): 183-189                               | NR          |
| 423 | Kivistö et al.           | European Archives of Paediatric Dentistry 2014; 15(3): 197-202                               | NR          |
| 424 | Masumo et al.            | Acta Odontologica Scandinavica 2014; 72(4): 312-320                                          | NR          |
| 425 | Bücher et al.            | Clinical Oral Investigations 2014; 18(3): 775-782                                            | NR          |
| 426 | Klinke et al.            | Caries Research 2014; 48(1): 24-31                                                           | NR          |
| 427 | Aminabadi et al.         | Caries Research 2014; 48(1): 3-12                                                            | NR          |
| 428 | Arrow et al.             | BMC Public Health 2013; 13: 245                                                              | NR          |
| 429 | Meihubers                | New South Wales Public Health Bulletin 2013; 24(3): 128-130                                  | NR          |
| 430 | Hutchings et al.         | Trials 2013; 14(1): 147                                                                      | NR          |
| 431 | Khandelwal et al.        | BMJ Case Reports 2013; 2013: bcr2013010029                                                   | Fallbericht |
| 432 | Monse et al.             | BMC Public Health 2013; 13: 256                                                              | NR          |
| 433 | Pukallus et al.          | BMJ Open 2013; 3:5 Article Number: 002579                                                    | NR          |
| 434 | Ribeiro et al.           | International Journal of Paediatric Dentistry 2013; 23(3): 225-234                           | NR          |
| 435 | Hendrix et al.           | Journal of Public Health Dentistry 2013; 73(4): 297-303                                      | NR          |
| 436 | Banoczy et al.           | Acta Medica Academica 2013; 42(2): 156-167                                                   | NR          |
| 437 | Innes et al.             | BMC Oral Health 2013; 13: 25                                                                 | Protokoll   |
| 438 | Raj et al.               | BMC Oral Health 2013; 13: 67                                                                 | NR          |
| 439 | Prasai Dixit et al.      | BMC Oral Health 2013; 13: 20                                                                 | NR          |
| 440 | Curtis et al.            | Australian Dental Journal 2011; 561: 48-55                                                   | NR          |
| 441 | Maxim et al.             | Revista medico-chirurgicala a Societatii de Medici si Naturalisti din Iasi 2010; 1143: 866-9 | NR          |
| 442 | Warren et al.            | Value Health 2010; 136: 750-60                                                               | NR          |
| 443 | Freeman & Oliver         | British Dental Journal 2009; 20612: 619-25                                                   | NR          |
| 444 | Milnes                   | Journal of the Canadian Dental Association 2003; 695: 298-302                                | NR          |

|     |          |                                                              |    |
|-----|----------|--------------------------------------------------------------|----|
| 445 | Farsi    | Odonto-stomatologie Tropicale 1999; 2286: 27-32              | NR |
| 446 | Horowitz | Community Dentistry Oral Epidemiology 1998; 261(Suppl): 91-5 | NR |
