# Supplementary figures and images for: Cost-Effectiveness of Treatment Decisions for Early Childhood Caries in Infants and Toddlers: A Systematic Review
Source: MDPI journal article supplement (doi:10.3390/medicina59101865), 2023-10-20

Figure S2. PRISMA flow diagram

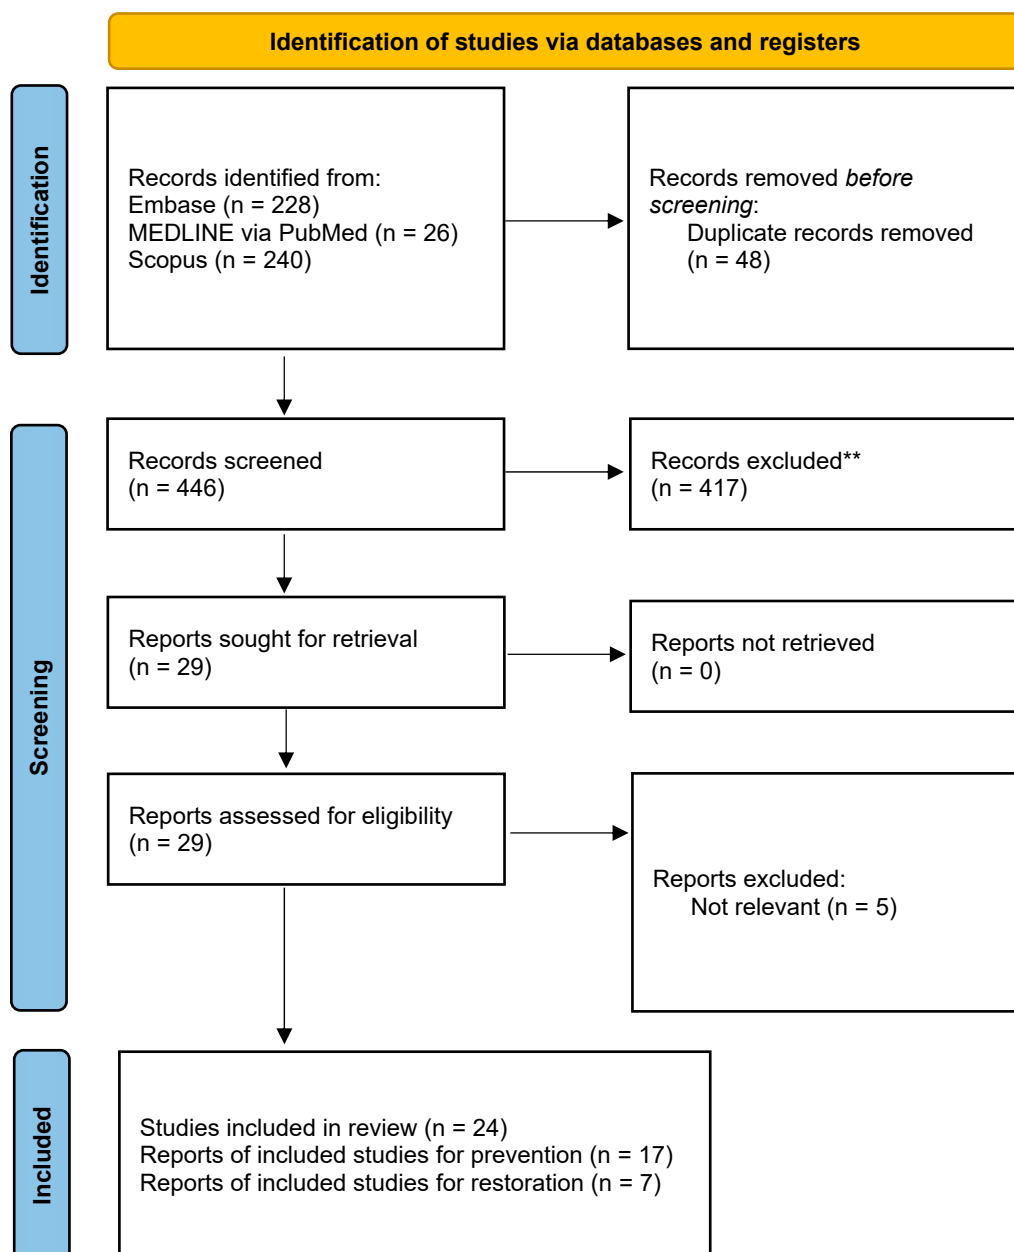

Supplement: s1 [file s1]
